# Supplementary material
Source: Copernicus journal article supplement (doi:10.5194/egusphere-2025-6401)
Supplement: Supplementary file [file egusphere-2025-6401-AC4-supplement.pdf]

Dear reviewer and editors,

We sincerely appreciate the reviewer for the insightful and constructive comments, which have significantly enhanced the quality of our manuscript. We have carefully revised the manuscript to address all the concerns raised. Below, the reviewer comments are shown in black, with our responses in blue.

**Q1:** The authors base their study on a daily index that they briefly discuss the derivation and discusses the concept of flash droughts which seems like an impossibility to me. The main result of the study is the fitting of a double-logarithmic function for the combination of frequency and duration of the drought periods. As one of the motivations are these flash droughts, how can this research help with that?

**REPLY:** As you rightly pointed out, the distribution of parameter  $k$  in our study indeed reflects the distribution of droughts. In arid regions, the absolute value of  $k$  is larger, and the maximum drought duration tends to be longer. In contrast, in humid regions, the absolute value of  $k$  is smaller, the maximum drought duration is shorter, and flash droughts also frequently occur there. We have incorporated this information in section 4 discussion.

*This finding also facilitates the identification of flash drought events with greater precision. As evidenced by the spatial distribution of parameter  $k$ , flash droughts persisting for several days to several tens of days occur more frequently in humid southern regions, where higher absolute values of  $k$  correspond to elevated occurrence frequencies of short-duration droughts.*

Additionally, we have made the following improvements to the description of Figure 7b.

*It is indicated that although the drought occurrence frequency in humid and semi-humid regions is relatively higher, the corresponding drought duration is generally shorter, whereas drought duration in arid and semi-arid regions is generally longer.*

**Q2:** Is the derived function well-constrained and in what range is it valid? In Figure 7b, the frequency curve seems to not approach zero rather flatten at a constant value, what does that do to the overall distribution?

**REPLY:** We understand your concern. In fact, according to the equation, as drought duration  $\tau \rightarrow \infty$ , frequency  $f$  should approach 0. Table 1 below presents the numerical values of  $\tau$  and  $f$  when  $k > -0.6$  in Figure 7b ( $125 \leq \tau \leq 150$ ) marked as red line in Figure 7b(as follows) . It can be seen that  $f$  indeed decreases with increasing  $\tau$  and approaches 0 value slowly. Tables 2 and 3 present the results for  $-0.8 < k \leq -0.6$  and  $k \leq -0.8$ .

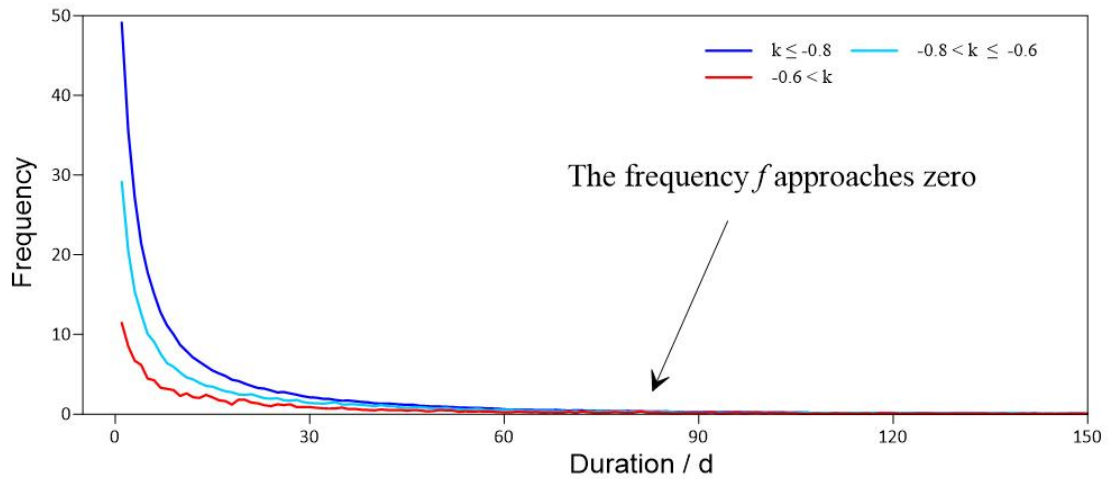

Figure 7b The relationship between the drought duration and its frequency with different parameters

Table 1 Parameter  $f$  value with  $\tau$  when  $k > -0.6$

| $\tau$ value | $f$ value | $\tau$ value | $f$ value | $\tau$ value | $f$ value |
|--------------|-----------|--------------|-----------|--------------|-----------|
| 125          | 0.0615    | 134          | 0.0923    | 143          | 0.0154    |
| 126          | 0.0923    | 135          | 0.0462    | 144          | 0.0615    |
| 127          | 0.0308    | 136          | 0.0154    | 145          | 0.0154    |
| 128          | 0.0308    | 137          | 0.0769    | 146          | 0.0615    |
| 129          | 0.0615    | 138          | 0.0000    | 147          | 0.0462    |
| 130          | 0.0923    | 139          | 0.0308    | 148          | 0.0615    |
| 131          | 0.0615    | 140          | 0.0769    | 149          | 0.0769    |
| 132          | 0.0769    | 141          | 0.0154    | 150          | 0.0462    |
| 133          | 0.0615    | 142          | 0.0769    |              |           |

Table 2 Parameter  $f$  value with  $\tau$  when  $-0.8 < k \leq -0.6$

| $\tau$ value | $f$ value | $\tau$ value | $f$ value | $\tau$ value | $f$ value |
|--------------|-----------|--------------|-----------|--------------|-----------|
| 125          | 0.0866    | 134          | 0.0909    | 143          | 0.0563    |
| 126          | 0.1169    | 135          | 0.1169    | 144          | 0.0519    |
| 127          | 0.0693    | 136          | 0.0476    | 145          | 0.0346    |
| 128          | 0.0866    | 137          | 0.0519    | 146          | 0.0649    |
| 129          | 0.0606    | 138          | 0.1212    | 147          | 0.0303    |
| 130          | 0.0736    | 139          | 0.1429    | 148          | 0.0433    |
| 131          | 0.0779    | 140          | 0.0693    | 149          | 0.0519    |
| 132          | 0.0823    | 141          | 0.0866    | 150          | 0.0303    |
| 133          | 0.0693    | 142          | 0.0606    |              |           |

Table 3 Parameter  $f$  value with  $\tau$  when  $k \leq -0.8$

| $\tau$ value | $f$ value | $\tau$ value | $f$ value | $\tau$ value | $f$ value |
|--------------|-----------|--------------|-----------|--------------|-----------|
| 125          | 0.1006    | 134          | 0.0793    | 143          | 0.055     |
| 126          | 0.0974    | 135          | 0.0575    | 144          | 0.0612    |
| 127          | 0.0874    | 136          | 0.0681    | 145          | 0.0500    |
| 128          | 0.0874    | 137          | 0.0593    | 146          | 0.0518    |
| 129          | 0.0843    | 138          | 0.0662    | 147          | 0.0587    |
| 130          | 0.0675    | 139          | 0.0562    | 148          | 0.0587    |
| 131          | 0.0868    | 140          | 0.0581    | 149          | 0.0487    |
| 132          | 0.075     | 141          | 0.0643    | 150          | 0.0575    |
| 133          | 0.0787    | 142          | 0.06      |              |           |

Q3: The discussion section of the manuscript is extremely short and does not enlighten the reader on how more specifically this can be used, in what way, uncertainties, limitations, differences to other index used in other areas of the world etc.

REPLY: In section 4 discussion, we have added more information about this as follows:

*Several limitations should be acknowledged. First, the exclusion of the Qinghai-Tibet Plateau due to sparse station data may affect the completeness of the spatial pattern in western China. Second, MCI's climate-adaptive coefficients are calibrated for China and may not be directly applicable to other regions without recalibration. Third, the double-logarithmic fitting assumes stationarity in drought statistics; climate change may alter these relationships over time, requiring dynamic updating of parameters. Finally, the study focuses on meteorological drought; propagation to hydrological and agricultural droughts involves additional complexities not captured here. The use of MCI rather than SPI or SPEI introduces both advantages and limitations. MCI's multi-timescale design (incorporating 30-150 day precipitation anomalies) captures drought evolution better than SPI alone, but the*

*index is region-specific. Future research will employ complementary drought indices and independent observational networks to validate the robustness of the duration – frequency relationship across diverse hydroclimatic regimes.*
